# Supplementary material for: Construction of ultrathin MnO2 decorated graphene/carbon nanotube nanocomposites as efficient sulfur hosts for high-performance lithium–sulfur batteries
Source: Royal Society of Chemistry journal article supplement (doi:10.1039/c9ra00292h), 2019-01-01
Supplement: c9ra00292h1.pdf [file c9ra00292h1.pdf]

## Supporting Information

### Construction of ultrathin MnO<sub>2</sub> decorated graphene/carbon nanotube nanocomposites as efficient sulfur host for high-performance lithium-sulfur batteries

Nan Wang, Sikan Peng, Xiang Chen, Jixian Wang, Chen Wang, Xin Qi, Shenglong Dai and Shaojiu Yan\*

*Beijing Institute of Aeronautical Materials (BIAM), Beijing, 100095, P. R. China.*

\*Email: [shaojiuyan@126.com](mailto:shaojiuyan@126.com)

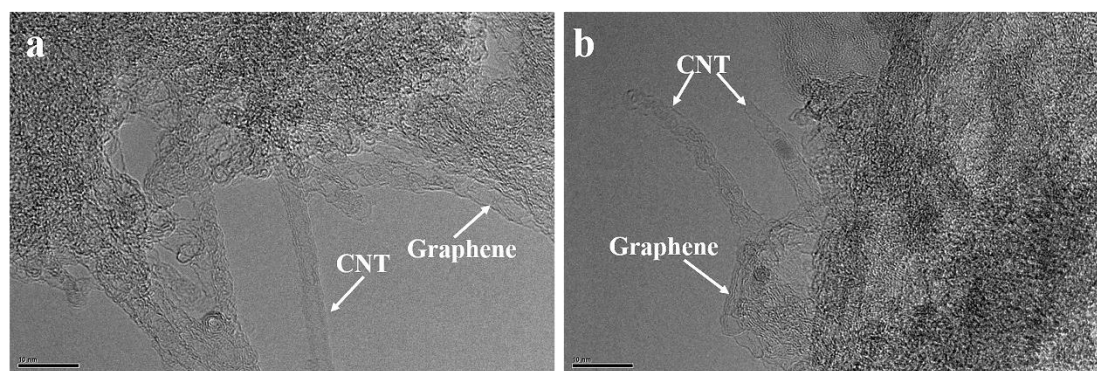

Fig. S1 HRTEM images of G/CNT hybrids with structure details

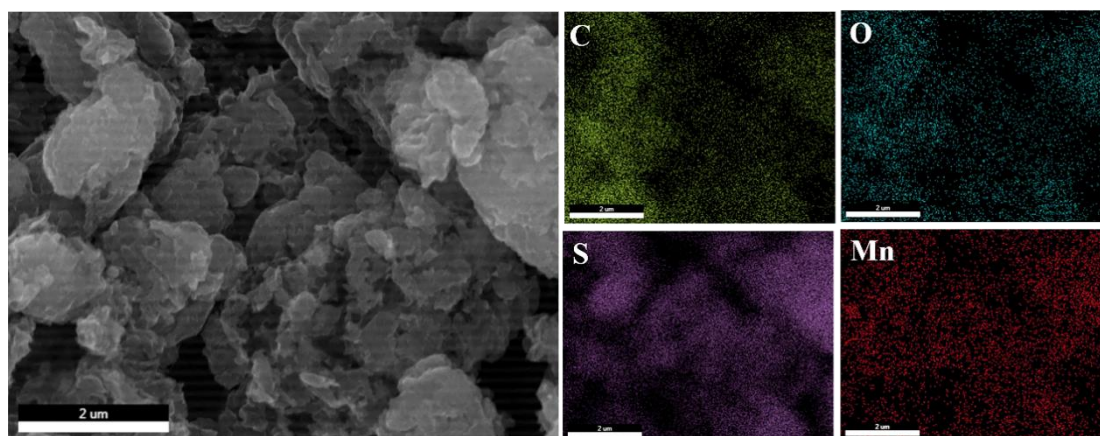

Fig. S2 SEM image of G/CNT@MnO<sub>2</sub>@S composite and the corresponding EDX elemental mapping of C (green), O (blue), S (purple) and Mn (red).

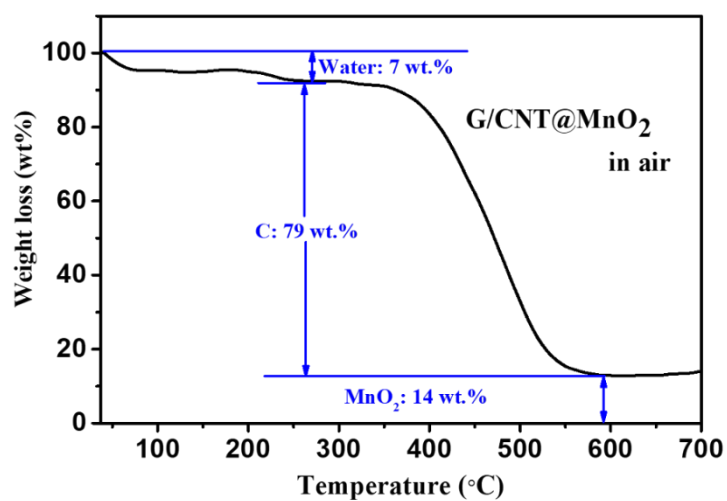

Fig. S3 TGA curves of G/CNT@MnO<sub>2</sub> in air atmosphere with 10 °C min<sup>-1</sup>.

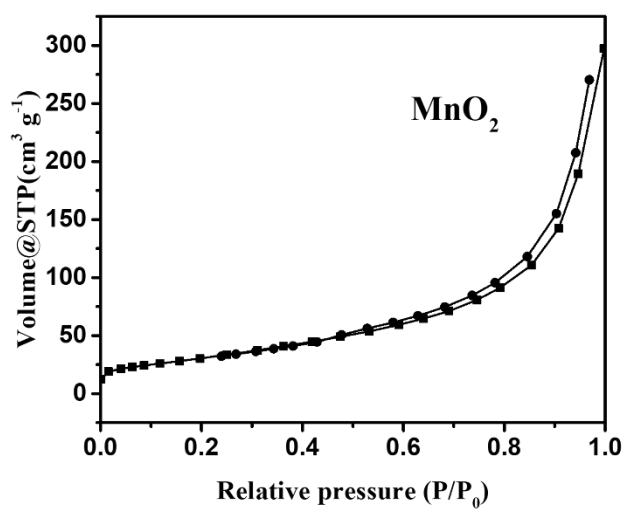

Fig. S4 N<sub>2</sub> adsorption/desorption isotherms for MnO<sub>2</sub>.

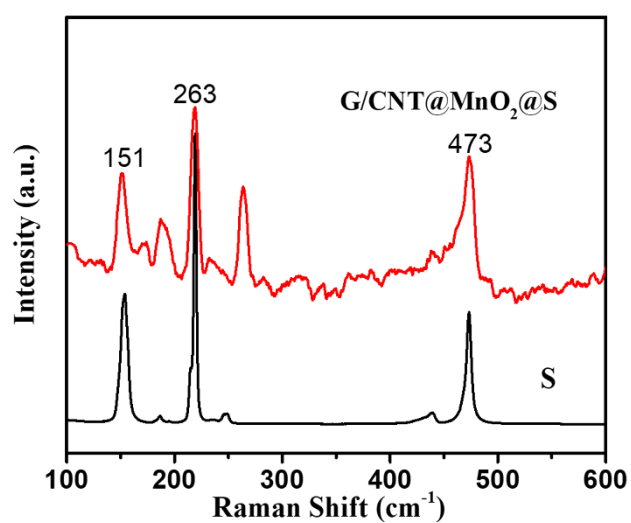

Fig. S5 Raman spectra of G/CNT@MnO<sub>2</sub>@S.

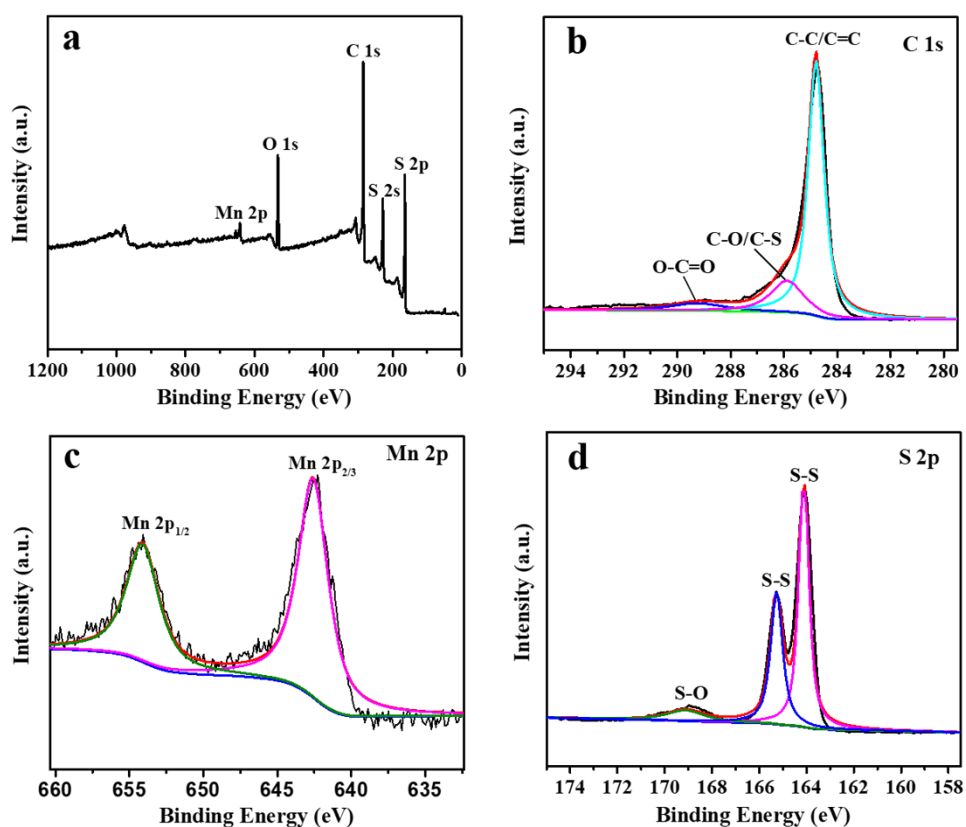

Fig. S6 XPS spectra of the G/CNT@MnO<sub>2</sub>@S composite. (a) Full spectra, (b) C 1s spectra, (c) Mn 2p spectra, (d) S 2p spectra.

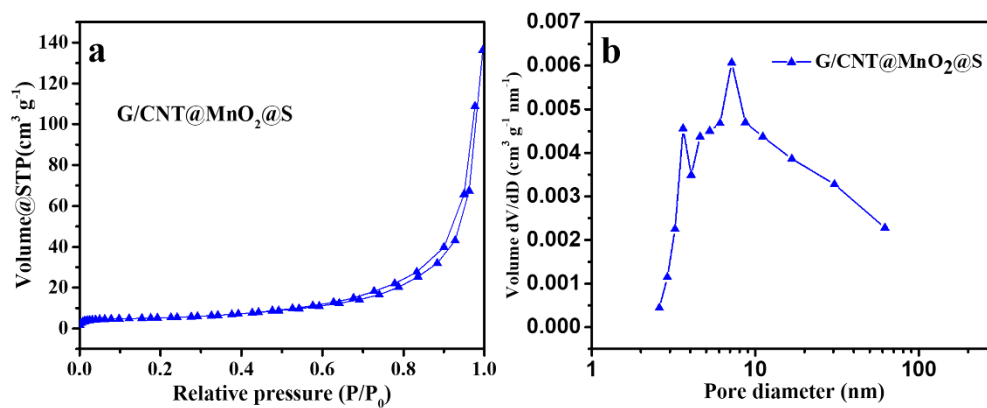

Fig. S7 (a) N<sub>2</sub> adsorption/desorption isotherms for G/CNT@MnO<sub>2</sub>@S, (b) BJH pore size distribution for G/CNT@MnO<sub>2</sub>@S.

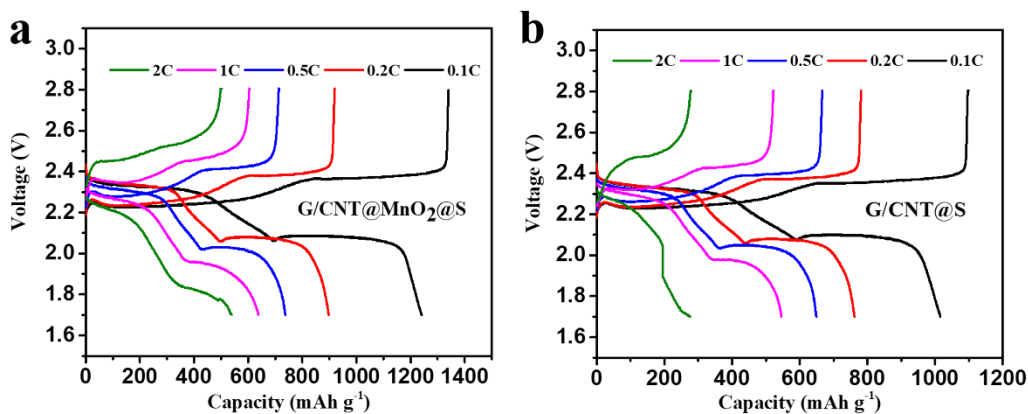

Fig. S8 Voltage profiles at various C rates of (a) G/CNT@MnO<sub>2</sub>@S, and (b) G/CNT@S.

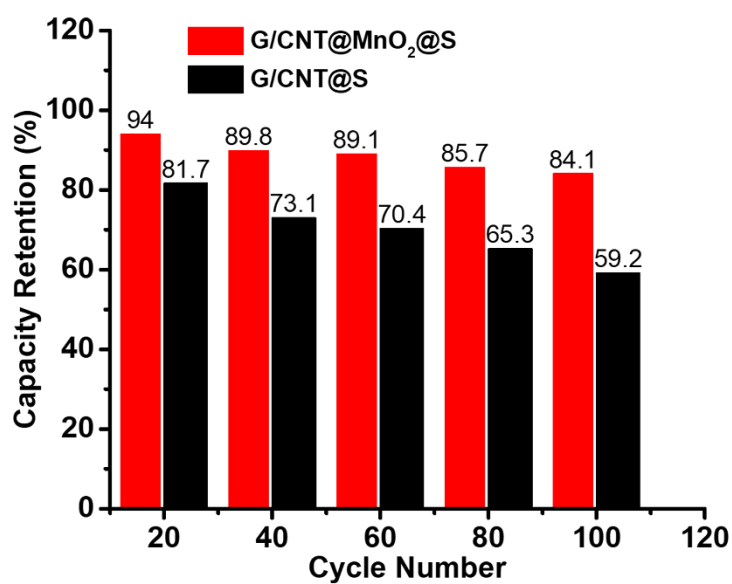

Fig. S9 Capacity retention of G/CNT@MnO<sub>2</sub>@S, and G/CNT@S at 0.1C.

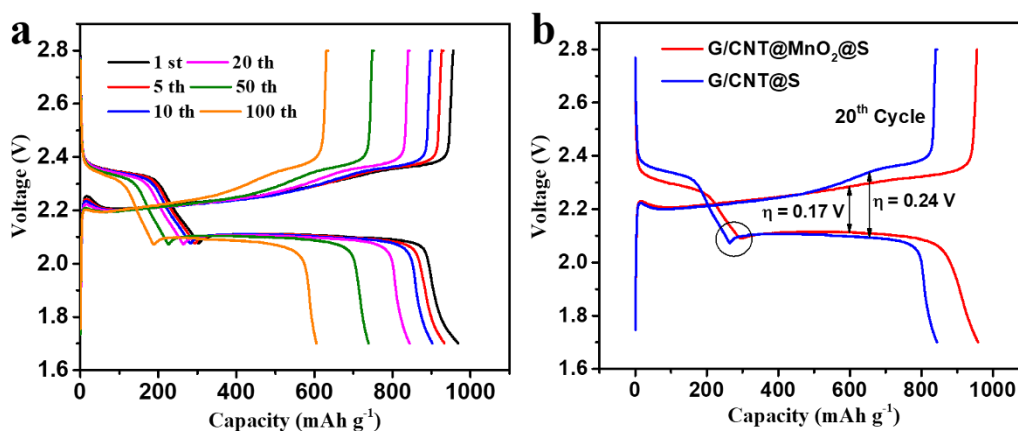

Fig. S10 (a) Voltage profiles of G/CNT@S at 0.1C, (b) Voltage profiles of G/CNT@MnO<sub>2</sub>@S and G/CNT@S of the 20<sup>th</sup> cycle at 0.1C.

Table S1. Elemental analysis of the composites

| Composite                 | Element Weight Percentage (%) |       |      |
|---------------------------|-------------------------------|-------|------|
|                           | S                             | C     | Mn   |
| G/CNT@MnO <sub>2</sub> @S | 81.76                         | 15.38 | 1.68 |
| G/CNT@S                   | 81.38                         | 18.17 | N/A  |

Table S2

The cycling performance comparison of this work with some other similar composites. [19, 23, 25, 37, 39, 42, 46-48]

| Electrodes                | Sulfur loading (mg cm <sup>-2</sup> ) | Rate   | Cycles | Initial capacity (mAh g <sup>-1</sup> ) | Capacity retention | Ref.      |
|---------------------------|---------------------------------------|--------|--------|-----------------------------------------|--------------------|-----------|
| MnO <sub>2</sub> @HCB/S   | 0.7-1.0                               | 0.6 C  | 60     | 1042                                    | ≈48%               | 19        |
|                           |                                       | 1.79C  | 200    | 503                                     | ≈20%               |           |
| S@MnO <sub>2</sub> @GO    | 1.0                                   | 0.36 C | 100    | 1160                                    | ≈58%               | 23        |
| rGM-SA67                  | 0.8                                   | 0.2 C  | 100    | ≈1200                                   | ≈75%               | 25        |
| S-MnO <sub>2</sub> @GN    | 1.0                                   | 0.2 C  | 100    | 1116                                    | 74%                | 37        |
| MnO <sub>2</sub> @HCF/S   | 3.5                                   | 0.2 C  | 100    | 1147                                    | ≈75%               | 39        |
|                           |                                       | 0.5 C  | 100    | ≈920                                    | ≈84%               |           |
| S@PEDOT/MnO <sub>2</sub>  | /                                     | 0.2C   | 100    | 1150                                    | ≈71.9%             | 42        |
| S@MnO <sub>2</sub>        | 1.1-1.3                               | 1.0C   | 200    | 685.6                                   | 52.5%              | 46        |
|                           |                                       | 0.06C  | 200    | ≈1200                                   | ≈63%               |           |
| S-MnO <sub>2</sub> @C     | 1.0                                   | 0.1C   | 50     | ≈1150                                   | ≈40%               | 47        |
|                           |                                       | 1.0C   | 100    | ≈700                                    | ≈51%               |           |
| CNFs/MnO <sub>2</sub>     | 1.5                                   | 0.2C   | 100    | ≈1350                                   | ≈59%               | 48        |
| G/CNT@MnO <sub>2</sub> @S | 1.5-2.0                               | 0.1C   | 100    | 1015.1                                  | 84.1%              | This work |
|                           |                                       | 1.0C   | 200    | 758.1                                   | 77.9%              |           |

HCB: Hollow Carbon Nanoboxes, rGM-SA: reduced graphene oxide/ultrathin MnO<sub>2</sub> nanosheets-S aerogel, GN: Graphene, HCF: Hollow Carbon Nanofibers, CNFs: carbon nanofibers.
